# Supplementary material for: Risk of Adverse Neonatal Outcomes After Combined Prenatal Cannabis and Nicotine Exposure
Source: PubMed Central journal article supplement (PMC11077393; doi:10.1001/jamanetworkopen.2024.10151), 2024-05-07
Supplement: jamanetwopen-e2410151-s001.pdf [file jamanetwopen-e2410151-s001.pdf]

## Supplementary Online Content

Crosland BA, Garg B, Bandoli GE, et al. Risk of adverse neonatal outcomes after combined prenatal cannabis and nicotine exposure. *JAMA Netw Open*. 2024;7(5):e2410151. doi:10.1001/jamanetworkopen.2024.10151

**eTable 1.** Comparison of the Vital Statistics Records Linked to Patient Discharge Data Compare With Those Not Linked

**eTable 2.** Source of Variables

**eTable 3.** Multivariable Poisson Regression Analyses Using *ICD-9-CM* and *ICD-10-CM* Codes for Cannabis and Nicotine Use (2012-2019)

**eTable 4.** Multivariable Poisson Regression Analyses Using California Data (2017-2019) Showing Association of Cannabis and/or Nicotine Use With Adverse Perinatal Outcomes

**eTable 5.** Multivariable Poisson Regression Analyses After Inclusion of Patients of Other or More Than 1 Race in California (2012-2019)

This supplementary material has been provided by the authors to give readers additional information about their work.

**eTable 1.** Comparison of the Vital Statistics Records Linked to Patient Discharge Data Compared With Those Not Linked

|                                            | Analytic sample<br>(N=3,425,870) | Individuals not linked<br>(N=217,303) |
|--------------------------------------------|----------------------------------|---------------------------------------|
| <b>Race/ethnicity</b>                      |                                  |                                       |
| American Indian and Alaska Native          | 0.30%                            | 0.30%                                 |
| Asian/Pacific Islanders                    | 12.30%                           | 13.00%                                |
| Hispanic                                   | 49.10%                           | 47.70%                                |
| Non-Hispanic white                         | 26.70%                           | 25.40%                                |
| Non-Hispanic Black                         | 4.90%                            | 5.10%                                 |
| Other/Multiracial                          | 6.80%                            | 8.50%                                 |
| <b>Maternal age (Years)</b>                |                                  |                                       |
| <20                                        | 5.10%                            | 4.70%                                 |
| 20-34                                      | 73.50%                           | 71.70%                                |
| ≥35                                        | 21.50%                           | 23.60%                                |
| <b>Education</b>                           |                                  |                                       |
| High school or less                        | 40.00%                           | 36.30%                                |
| Some college                               | 60.00%                           | 63.70%                                |
| <b>Pre-pregnancy body mass index (BMI)</b> |                                  |                                       |
| Underweight                                | 3.80%                            | 3.40%                                 |
| Normal weight                              | 46.10%                           | 45.20%                                |
| Overweight                                 | 26.50%                           | 27.20%                                |
| Obese                                      | 23.60%                           | 24.20%                                |
| <b>Insurance</b>                           |                                  |                                       |
| Private                                    | 48.20%                           | 57.70%                                |
| Public                                     | 51.80%                           | 42.30%                                |
| Nulliparous                                | 39.00%                           | 39.70%                                |
| Prenatal visits (less than five)           | 2.60%                            | 4.10%                                 |
| Alcohol use                                | 0.10%                            | 0.00%                                 |
| Substance related diagnosis                | 0.90%                            | 0.60%                                 |

|                         |       |       |
|-------------------------|-------|-------|
| Chronic hypertension    | 2.10% | 1.70% |
| Pre-existing diabetes   | 1.30% | 1.10% |
| Mental health disorders | 3.90% | 1.00% |

**eTable 2.** Source of Variables

| Variable                            | Data source                                  | Notes/ICD-9 codes                                                      | ICD-10 codes                                                  |
|-------------------------------------|----------------------------------------------|------------------------------------------------------------------------|---------------------------------------------------------------|
| Race and ethnicity                  | Vital statistics                             |                                                                        |                                                               |
| Age                                 | Vital statistics                             |                                                                        |                                                               |
| Education                           | Vital statistics                             |                                                                        |                                                               |
| Pre-pregnancy body mass index (BMI) | Vital statistics                             | Calculated from height and pre-pregnancy weight                        |                                                               |
| Insurance                           | Vital statistics                             |                                                                        |                                                               |
| Parity                              | Vital statistics                             |                                                                        |                                                               |
| Prenatal visits                     | Vital statistics                             |                                                                        |                                                               |
| Alcohol use                         | Hospital discharge data                      | 291.81, 303.0, 303.9, 305.0, 790.3, 980.x                              | F10                                                           |
| Chronic hypertension                | Hospital discharge data and vital statistics | 642.1, 642.2, 642.7, 401.x, 402.x, 403.x, 404.x, 405.x                 | I10.x, I11.x, I12.x, I13.x, I14.x, I15.x, I16.x, O10.x, O11.x |
| Pre-existing diabetes               | Hospital discharge data and vital statistics | 250.x                                                                  | E10, E11, O24.0, O24.1, O24.3, O24.8                          |
| Mental health disorders             | Hospital discharge data                      | 300.x, 296.2, 296.3, 311.x, 296.0, 296.4, 296.5, 296.6, 296.80, 296.89 | F41, F32, F33, F31                                            |
| Cannabis-use                        | Hospital discharge data                      | 305.2, 304.3                                                           | F12                                                           |

|                               |                                              |                                                                              |                                 |
|-------------------------------|----------------------------------------------|------------------------------------------------------------------------------|---------------------------------|
| Nicotine                      | Hospital discharge data and vital statistics | 305.1, 649.0                                                                 | O99.33, F17                     |
| Hypertensive disease          | Hospital discharge data and vital statistics | 642.0, 642.3, 642.4, 642.5                                                   | O13, O14                        |
| Preterm delivery<37 weeks     | Vital statistics                             |                                                                              |                                 |
| Preterm delivery<32 weeks     | Vital statistics                             |                                                                              |                                 |
| Severe maternal morbidity     | Hospital discharge data                      | Published algorithm using 21 indicators provided by CDC                      |                                 |
| NICU admission                | Vital statistics                             |                                                                              |                                 |
| Small for gestational age     | Vital statistics                             | Published algorithm using gestational age, neonate's gender and birth weight |                                 |
| Respiratory distress syndrome | Hospital discharge data                      | 769.x                                                                        | P22                             |
| Infant deaths                 | Vital statistics                             | Defined as deaths within one year of age                                     |                                 |
| Neonatal deaths               | Vital statistics                             | Defined as death between 0-28 days of birth                                  |                                 |
| Post-neonatal deaths          | Vital statistics                             | Defined as death between 28-265 days of birth.                               |                                 |
| Hypoglycemia                  | Hospital discharge data                      | 775.6, 251.0, 251.1, 251.2                                                   | P70.3, P70.4, E16.1, E16.2, E15 |
| Bronchopulmonary dysplasia    | Hospital discharge data                      | 770.7                                                                        | P27.1                           |

**eTable 3.** Multivariable Poisson Regression Analyses Using *ICD-9-CM* and *ICD-10-CM* Codes for Cannabis and Nicotine Use (2012-2019)

|                                   | Unexposed<br>(n= 3,054,340)<br>aRR (95% CI) <sup>a</sup> | Cannabis use<br>(n= 23,992)<br>aRR (95% CI) <sup>a</sup> | Nicotine use<br>(n= 42,253)<br>aRR (95% CI) <sup>a</sup> | Co-use<br>(n= 9,337)<br>aRR (95% CI) <sup>a</sup> |
|-----------------------------------|----------------------------------------------------------|----------------------------------------------------------|----------------------------------------------------------|---------------------------------------------------|
| <b>Maternal outcomes</b>          |                                                          |                                                          |                                                          |                                                   |
| Hypertensive disease              | Reference                                                | 1.36 (1.32, 1.41)                                        | 1.28 (1.24, 1.32)                                        | 1.34 (1.26, 1.41)                                 |
| Preterm delivery (<37 weeks)      | Reference                                                | 1.48 (1.43, 1.53)                                        | 1.52 (1.48, 1.56)                                        | 1.82 (1.74, 1.90)                                 |
| Very preterm delivery (<32 weeks) | Reference                                                | 1.54 (1.41, 1.68)                                        | 1.43 (1.33, 1.54)                                        | 1.63 (1.45, 1.84)                                 |
| Severe maternal morbidity (SMM)   | Reference                                                | 1.33 (1.22, 1.44)                                        | 1.53 (1.44, 1.63)                                        | 1.48 (1.31, 1.67)                                 |
| Non-transfusion SMM               | Reference                                                | 1.41 (1.22, 1.63)                                        | 1.72 (1.55, 1.92)                                        | 1.69 (1.38, 2.08)                                 |
| <b>Neonatal outcomes</b>          |                                                          |                                                          |                                                          |                                                   |
| NICU admission                    | Reference                                                | 1.34 (1.30, 1.38)                                        | 1.58 (1.55, 1.62)                                        | 1.76 (1.69, 1.83)                                 |
| Small for gestational age         | Reference                                                | 1.47 (1.42, 1.52)                                        | 1.62 (1.58, 1.66)                                        | 1.90 (1.82, 1.99)                                 |
| Respiratory distress syndrome     | Reference                                                | 1.41 (1.34, 1.48)                                        | 1.39 (1.34, 1.44)                                        | 1.58 (1.47, 1.69)                                 |
| Infant deaths                     | Reference                                                | 1.65 (1.42, 1.93)                                        | 1.72 (1.53, 1.94)                                        | 2.19 (1.81, 2.65)                                 |
| Neonatal death                    | Reference                                                | 1.37 (1.10, 1.70)                                        | 1.44 (1.22, 1.69)                                        | 1.67 (1.26, 2.21)                                 |
| Post-neonatal death               | Reference                                                | 2.07 (1.69, 2.58)                                        | 2.16 (1.82, 2.55)                                        | 3.04 (2.33, 3.96)                                 |
| Hypoglycemia                      | Reference                                                | 1.49 (1.39, 1.59)                                        | 1.35 (1.28, 1.42)                                        | 1.48 (1.33, 1.64)                                 |
| Bronchopulmonary dysplasia        | Reference                                                | 1.69 (1.22, 2.33)                                        | 1.24 (0.93, 1.68)                                        | 1.42 (0.86, 2.32)                                 |

aRR—Adjusted risk ratio, CI—Confidence interval

<sup>a</sup> Adjusted for maternal race and ethnicity, age, education, pre-pregnancy BMI, insurance, parity, prenatal visits, chronic hypertension, pre-existing diabetes, and mental health disorders

**eTable 4.** Multivariable Poisson Regression Analyses Using California Data (2017-2019) Showing Association of Cannabis and/or Nicotine Use With Adverse Perinatal Outcomes

|                                   | Unexposed<br>(n= 1,140,467)<br><br>aRR (95% CI) <sup>a</sup> | Cannabis use<br>(n= 11,194)<br><br>aRR (95% CI) <sup>a</sup> | Nicotine use<br>(n= 19,364)<br><br>aRR (95% CI) <sup>a</sup> | Co-use<br>(n= 4,171)<br><br>aRR (95% CI) <sup>a</sup> |
|-----------------------------------|--------------------------------------------------------------|--------------------------------------------------------------|--------------------------------------------------------------|-------------------------------------------------------|
| <b>Maternal outcomes</b>          |                                                              |                                                              |                                                              |                                                       |
| Hypertensive disease              | Reference                                                    | 1.38 (1.32, 1.45)                                            | 1.24 (1.19, 1.29)                                            | 1.42 (1.31, 1.54)                                     |
| Preterm delivery (<37 weeks)      | Reference                                                    | 1.47 (1.40, 1.55)                                            | 1.50 (1.44, 1.56)                                            | 1.85 (1.72, 1.98)                                     |
| Very preterm delivery (<32 weeks) | Reference                                                    | 1.59 (1.39, 1.82)                                            | 1.40 (1.25, 1.56)                                            | 1.74 (1.45, 2.08)                                     |
| Severe maternal morbidity (SMM)   | Reference                                                    | 1.29 (1.14, 1.47)                                            | 1.51 (1.37, 1.66)                                            | 1.55 (1.29, 1.86)                                     |
| Non-transfusion SMM               | Reference                                                    | 1.46 (1.19, 1.80)                                            | 1.58 (1.34, 1.86)                                            | 1.80 (1.33, 2.43)                                     |
| <b>Neonatal outcomes</b>          |                                                              |                                                              |                                                              |                                                       |
| NICU admission                    | Reference                                                    | 1.35 (1.28, 1.41)                                            | 1.71 (1.66, 1.77)                                            | 1.82 (1.71, 1.92)                                     |
| Small for gestational age         | Reference                                                    | 1.47 (1.39, 1.54)                                            | 1.63 (1.57, 1.69)                                            | 1.90 (1.77, 2.04)                                     |
| Respiratory distress syndrome     | Reference                                                    | 1.25 (1.17, 1.33)                                            | 1.45 (1.38, 1.51)                                            | 1.60 (1.47, 1.75)                                     |
| Infant deaths                     | Reference                                                    | 1.82 (1.44, 2.30)                                            | 1.20 (0.97, 1.50)                                            | 2.32 (1.72, 3.13)                                     |
| Neonatal death                    | Reference                                                    | 1.49 (1.07, 2.09)                                            | 1.02 (0.75, 1.38)                                            | 1.84 (1.20, 2.83)                                     |
| Post-neonatal death               | Reference                                                    | 2.27 (1.63, 3.17)                                            | 1.46 (1.07, 1.99)                                            | 3.05 (2.00, 4.64)                                     |
| Hypoglycemia                      | Reference                                                    | 1.46 (1.33, 1.59)                                            | 1.33 (1.23, 1.43)                                            | 1.52 (1.33, 1.75)                                     |
| Bronchopulmonary dysplasia        | Reference                                                    | 1.71 (1.06, 2.78)                                            | 1.01 (0.62, 1.63)                                            | 1.38 (0.65, 2.97)                                     |

aRR—Adjusted risk ratio, CI—Confidence interval

<sup>a</sup> Adjusted for maternal race and ethnicity, age, education, pre-pregnancy BMI, insurance, parity, prenatal visits, chronic hypertension, pre-existing diabetes, and mental health disorders

**eTable 5.** Multivariable Poisson Regression Analyses After Inclusion of Patients of Other or More Than 1 Race in California (2012-2019)

|                                   | Unexposed<br>(n=3,257,184)<br>aRR (95% CI) <sup>a</sup> | Cannabis use<br>(n=25,165)<br>aRR (95% CI) <sup>a</sup> | Nicotine use<br>(n=62,201)<br>aRR (95% CI) <sup>a</sup> | Co-use<br>(n=11,397)<br>aRR (95% CI) <sup>a</sup> |
|-----------------------------------|---------------------------------------------------------|---------------------------------------------------------|---------------------------------------------------------|---------------------------------------------------|
| <b>Maternal outcomes</b>          |                                                         |                                                         |                                                         |                                                   |
| Hypertensive disease              | Reference                                               | 1.35 (1.31, 1.40)                                       | 1.19 (1.16, 1.22)                                       | 1.31 (1.24, 1.38)                                 |
| Preterm delivery (<37 weeks)      | Reference                                               | 1.36 (1.41, 1.51)                                       | 1.47 (1.44, 1.51)                                       | 1.81 (1.74, 1.89)                                 |
| Very preterm delivery (<32 weeks) | Reference                                               | 1.57 (1.44, 1.71)                                       | 1.33 (1.25, 1.42)                                       | 1.61 (1.44, 1.81)                                 |
| Severe maternal morbidity (SMM)   | Reference                                               | 1.31 (1.21, 1.43)                                       | 1.41 (1.33, 1.49)                                       | 1.44 (1.29, 1.62)                                 |
| Non-transfusion SMM               | Reference                                               | 1.43 (1.24, 1.64)                                       | 1.48 (1.34, 1.63)                                       | 1.62 (1.34, 1.95)                                 |
| <b>Neonatal outcomes</b>          |                                                         |                                                         |                                                         |                                                   |
| NICU admission                    | Reference                                               | 1.31 (1.28, 1.35)                                       | 1.55 (1.52, 1.57)                                       | 1.78 (1.72, 1.84)                                 |
| Small for gestational age         | Reference                                               | 1.44 (1.39, 1.48)                                       | 1.67 (1.64, 1.71)                                       | 1.90 (1.82, 1.98)                                 |
| Respiratory distress syndrome     | Reference                                               | 1.41 (1.34, 1.48)                                       | 1.31 (1.27, 1.36)                                       | 1.60 (1.50, 1.71)                                 |
| Infant deaths                     | Reference                                               | 1.70 (1.47, 1.98)                                       | 1.67 (1.51, 1.84)                                       | 2.14 (1.80, 2.56)                                 |
| Neonatal death                    | Reference                                               | 1.28 (1.03, 1.60)                                       | 1.34 (1.16, 1.56)                                       | 1.79 (1.41, 2.29)                                 |
| Post-neonatal death               | Reference                                               | 2.30 (1.88, 2.83)                                       | 2.13 (1.85, 2.46)                                       | 2.71 (2.10, 3.49)                                 |
| Hypoglycemia                      | Reference                                               | 1.46 (1.36, 1.56)                                       | 1.27 (1.21, 1.33)                                       | 1.47 (1.34, 1.62)                                 |
| Bronchopulmonary dysplasia        | Reference                                               | 1.57 (1.13, 2.17)                                       | 1.00 (0.76, 1.31)                                       | 1.47 (0.95, 2.28)                                 |

aRR—Adjusted risk ratio, CI—Confidence interval

<sup>a</sup> Adjusted for maternal race and ethnicity, age, education, pre-pregnancy BMI, insurance, parity, prenatal visits, chronic hypertension, pre-existing diabetes, and mental health disorders
