# Supplementary material for: Risk of Adverse Neonatal Outcomes After Combined Prenatal Cannabis and Nicotine Exposure
Source: PubMed Central journal article supplement (PMC11077393; doi:10.1001/jamanetworkopen.2024.10151), 2024-05-07
Supplement: jamanetwopen-e2410151-s002.pdf [file jamanetwopen-e2410151-s002.pdf]

## Data Sharing Statement

Crosland. Risk of Adverse Neonatal Outcomes After Combined Prenatal Cannabis and Nicotine Exposure. *JAMA Netw Open*. Published May 07, 2024.

doi:10.1001/jamanetworkopen.2024.10151

### Data

**Data available:** No

### Additional Information

**Explanation for why data not available:** Data will be made available on reasonable request.
